# Supplementary material
Source: publisher site journal article supplement (https://www.dovepress.com/article/563397)
Supplement: Supplementary file 1 [file 563397%20Revised%20Supplementary%20Material.docx]

Supplementary Material Figure 1 LASSO Regression Analysis Plot


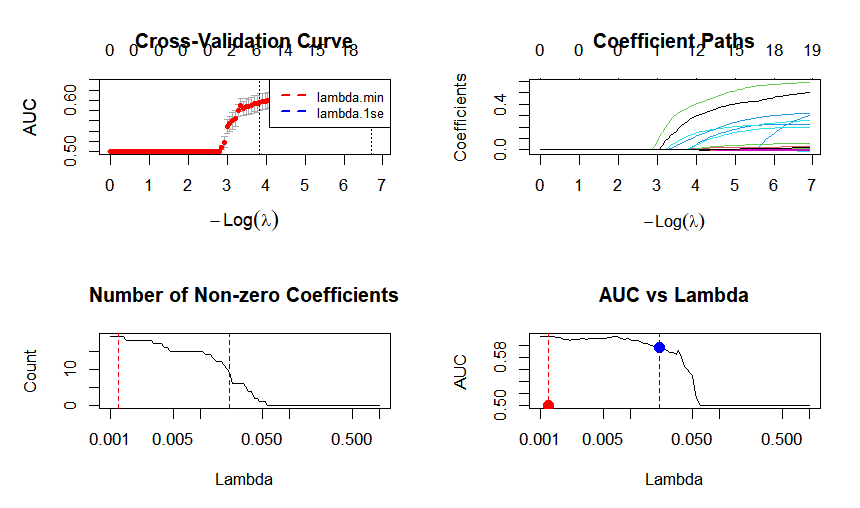


Supplementary Material Figure 2 Subgroup analysis


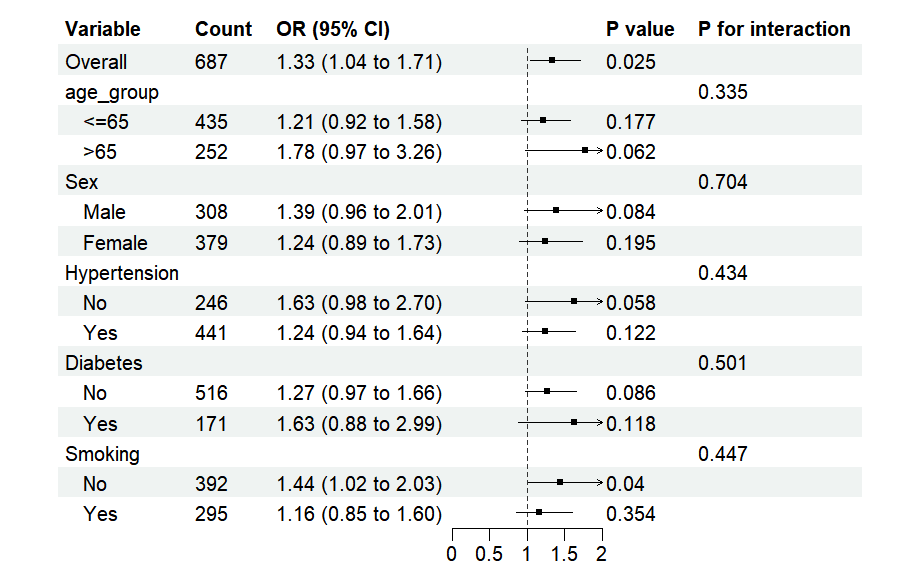


Supplementary Material Table 1 Correlation analysis

| **Variables** | **VIF** | **Tolerance** | ***P*** |
| --- | --- | --- | --- |
| sex | 1.590 | 0.629 | 0.029 |
| age | 1.160 | 0.862 | 0.005 |
| hypertension | 1.106 | 0.904 | 0.006 |
| diabetes | 1.065 | 0.939 | 0.304 |
| smoking | 1.604 | 0.623 | 0.255 |
| WBC | 1.136 | 0.880 | 0.370 |
| CK | 1.065 | 0.939 | 0.109 |
| CMI | 1.068 | 0.937 | 0.020 |
| LDL-C | 1.041 | 0.961 | 0.070 |
